# Supplementary material
Source: PubMed Central journal article supplement (PMC3629853)
Supplement: Supp_Fig1.pdf [file Supp_Fig1.pdf]

## Supplementary Data

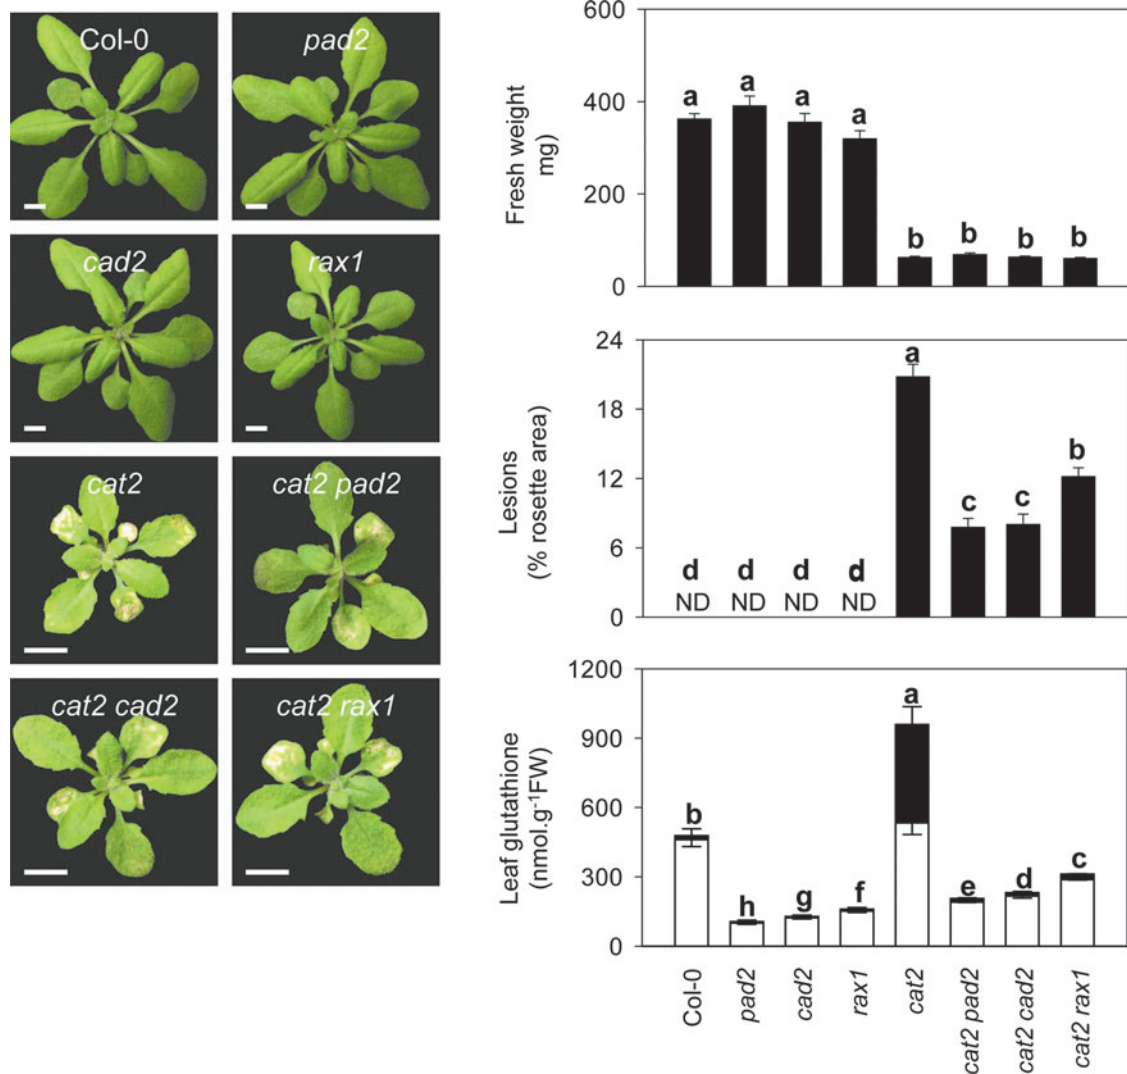

SUPPLEMENTARY FIG. S1. Confirmation of effects of genetic deficiency in glutathione (GSH) on H<sub>2</sub>O<sub>2</sub>-triggered lesion formation using allelic mutants.
