# Supplementary material
Source: PubMed Central journal article supplement (PMC3629853)
Supplement: Supp_Fig2.pdf [file Supp_Fig2.pdf]

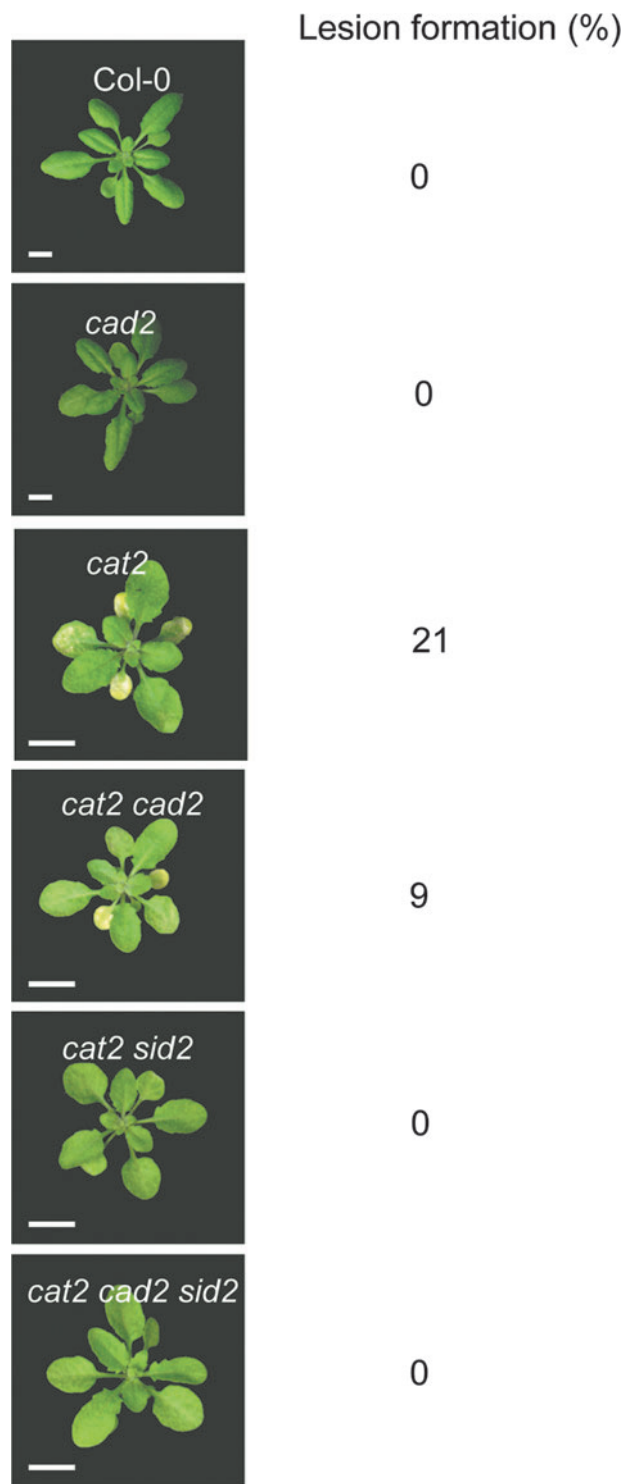

**SUPPLEMENTARY FIG. S2.** The *cat2 cad2 sid2* triple mutant shows that residual H<sub>2</sub>O<sub>2</sub>-induced lesions in *cat2 cad2* are dependent on the isochorismate synthase (ICS1) pathway.
