# Supplementary material
Source: PubMed Central journal article supplement (PMC3629853)
Supplement: Supp_Fig3.pdf [file Supp_Fig3.pdf]

Transfer to air from high CO<sub>2</sub>

4 days

10 days

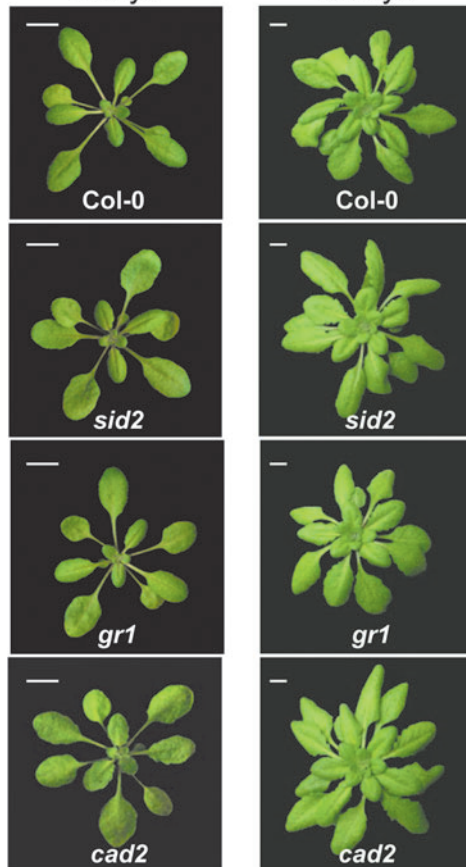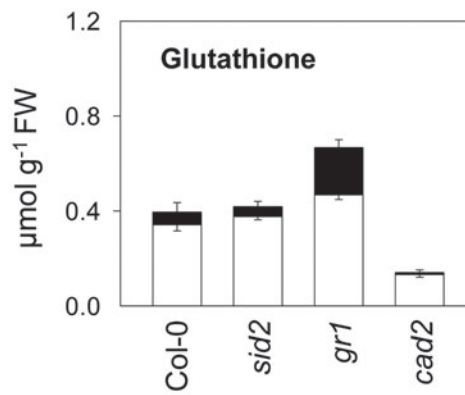

SUPPLEMENTARY FIG. S3. Phenotypes and GSH contents in Col-0, *sid2*, *gr1*, and *cad2* mutants following transfer to air after 3 weeks of growth from seed at high CO<sub>2</sub>.
