# Supplementary material
Source: PubMed Central journal article supplement (PMC3629853)
Supplement: Supp_Fig4.pdf [file Supp_Fig4.pdf]

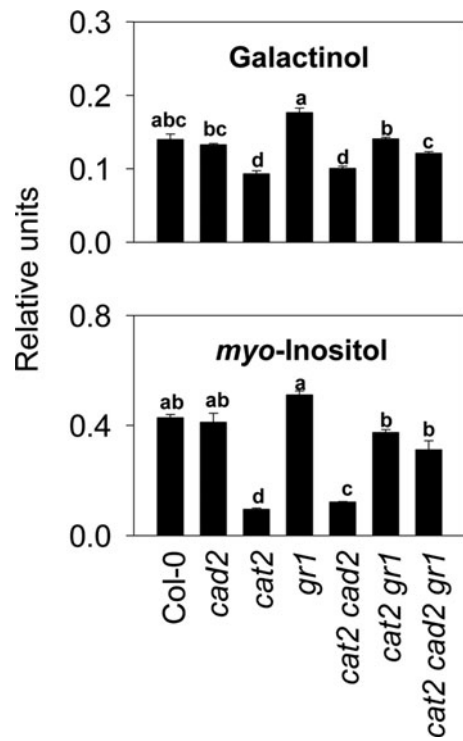

SUPPLEMENTARY FIG. S4. Effects of *cat2* and secondary *cad2* and *gr1* mutations on leaf *myo*-inositol and galactinol contents.
