# Supplementary material
Source: PubMed Central journal article supplement (PMC3629853)
Supplement: Supp_Fig6.pdf [file Supp_Fig6.pdf]

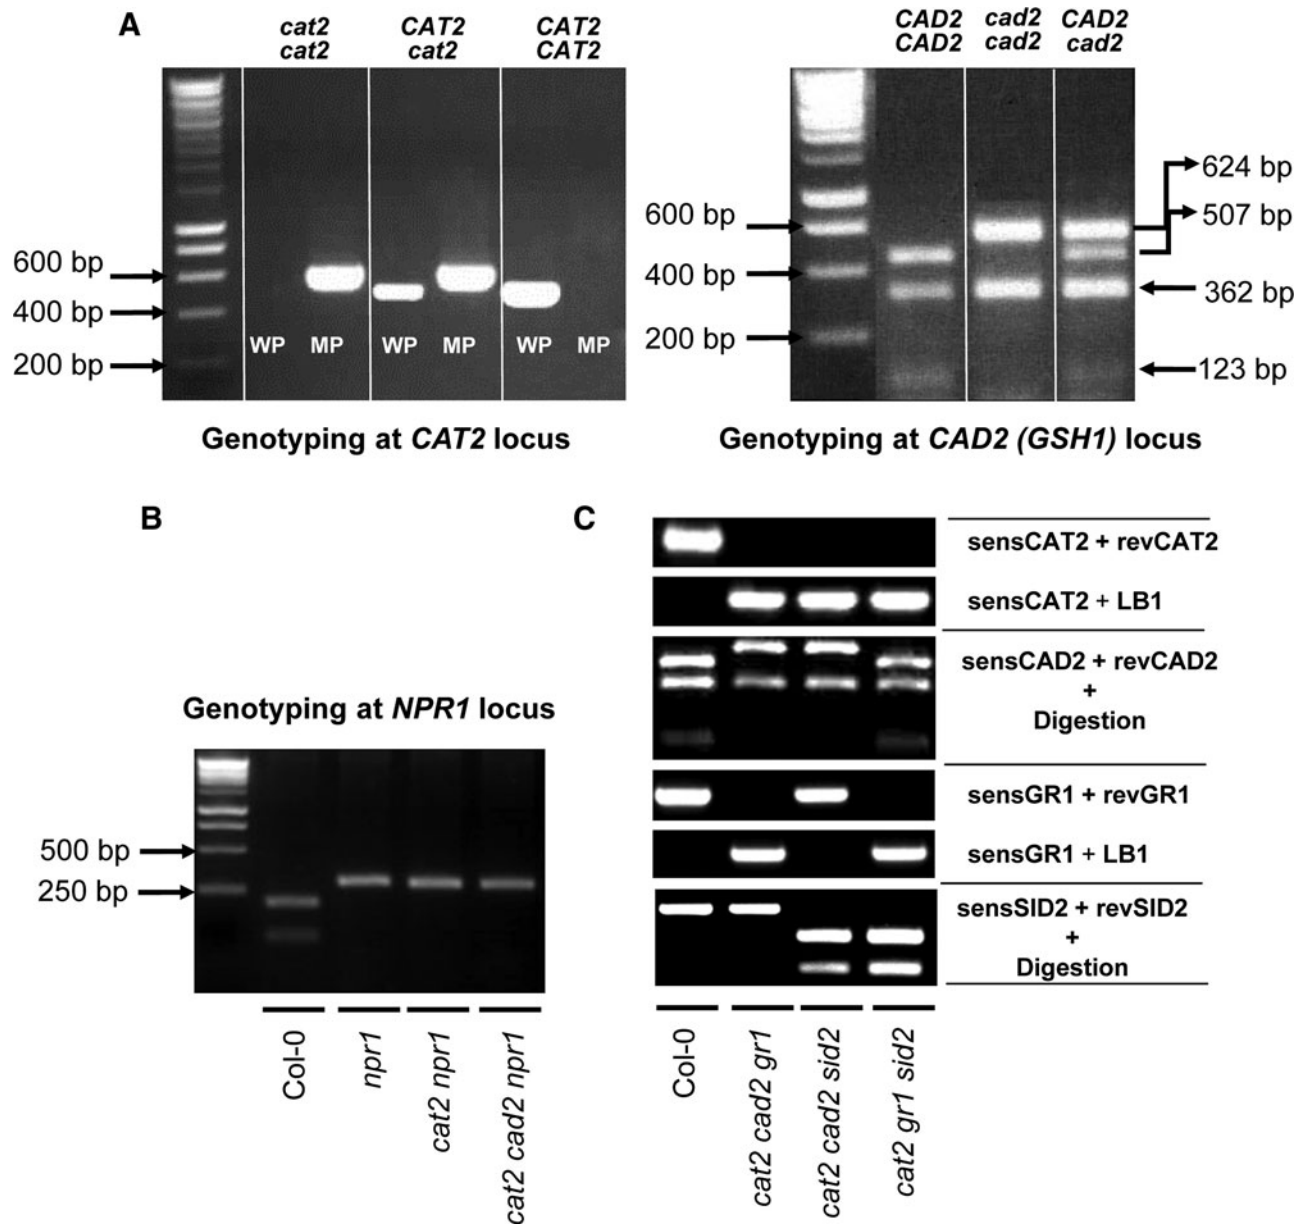

**SUPPLEMENTARY FIG. S6. Genotyping of double and triple mutants.** (A) Genotyping of *cat2 cad2* mutant. MP, mutant primer pair. WP, wild-type primer pair. (B) Genotyping at the *NPR1* locus to obtain *cat2 npr1* and *cat2 cad2 npr1* mutants. (C) Genotyping of other triple mutants by crossing *cat2 cad2* with *cat2 sid2* (Chaouch *et al.*, 2010) and *cat2 gr1* (Mhamdi *et al.*, 2010a).
