# Supplementary material
Source: PubMed Central journal article supplement (PMC3629853)
Supplement: Supp_Table3.pdf [file Supp_Table3.pdf]

SUPPLEMENTARY TABLE S3. DNA PRIMERS USED IN THIS STUDY

| <i>N°</i>                                 | <i>Oligonucleotide</i> | <i>Sequence</i>                     |
|-------------------------------------------|------------------------|-------------------------------------|
| Primers for genomic PCR screen of mutants |                        |                                     |
| 1                                         | sensCAT2               | 5'-CCCAGAGGTACCTCTTCTTCTCCCATG-3'   |
| 2                                         | revCAT2                | 5'-TCAGGGAACCTTCATCCCATCGC-3'       |
| 3                                         | sensGR1                | 5'-TTCTGGGGAAACATTCTCCTCTTGC-3'     |
| 4                                         | revGR1                 | 5'-GAGGTAAGTGTGCCTGCAATATGACACAC-3' |
| 5                                         | sensCAD2               | 5'-AGCATTTCACTTGAACCTGG-3'          |
| 6                                         | revCAD2                | 5'-TCCTTGTCAGTGTCTGTCC-3'           |
| 7                                         | sensNPR1               | 5'-CTCGAATGTACATAAGGC-3'            |
| 8                                         | revNPR1                | 5'-CGGTTCTACCTTCCAAAG-3'            |
| 9                                         | sensSID2               | 5'-GCTCTGCAGCTTCAATGC-3'            |
| 10                                        | revSID2                | 5'-CGAAGAAATGAAGAGCTTGG-3'          |
| 11                                        | LB1                    | 5'-TGGACCGCTTGCTGCAACTCTC-3'        |
| Primers for RT-qPCR                       |                        |                                     |
| 12                                        | ACT2up                 | 5'-CTGTACGGTAACATTGTGCTCAG-3'       |
| 13                                        | ACT2do                 | 5'-CCGATCCAGACACTGTACTTCC-3'        |
| 14                                        | qPCRPR1up              | 5'-AGGCTAACTACAACACTACGCTGCG-3'     |
| 15                                        | qPCRPR1do              | 5'-GCTTCTCGTTCACATAATTCCCAC-3'      |
| 16                                        | qPCRPR2up              | 5'-TCAAGGAGCTTAGCCTCACC-3'          |
| 17                                        | qPCRPR2do              | 5'-CGCCTAGCATCCCCTAGC-3'            |
| 18                                        | qPCRICS1up             | 5'-TTGGTGGCGAGGAGAGTG-3'            |
| 19                                        | qPCRICS1do             | 5'-CTTCCAGCTACTATCCCTGTCC-3'        |

qPCR, quantitative polymerase chain reaction; RT, reverse transcription.
