# Supplementary material
Source: PubMed Central journal article supplement (PMC3629853)

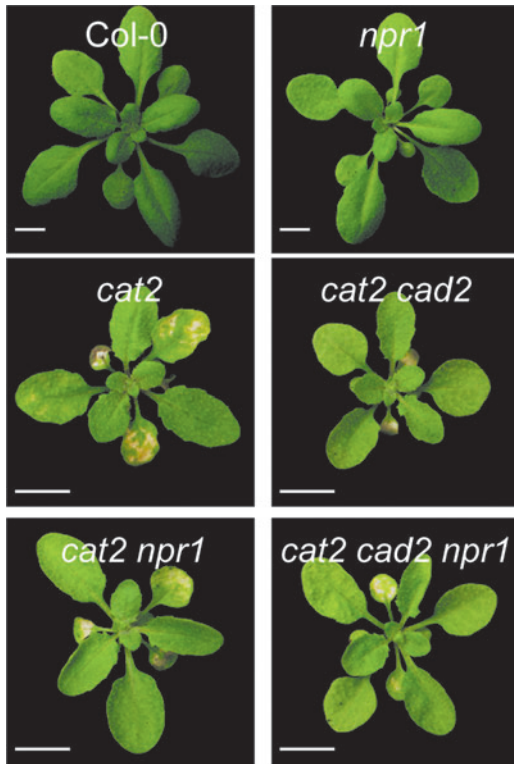

SUPPLEMENTARY FIG. S5. Phenotypes of *cat2 npr1* mutant shown alongside *cat2* and *cat2 cad2*.

Supplement: Supp_Fig5.pdf [file Supp_Fig5.pdf]
